# Supplementary material for: Photoluminescence emission induced by localized states in halide-passivated colloidal two-dimensional WS 2 nanoflakes
Source: Royal Society of Chemistry journal article supplement (doi:10.1039/d0tc05285j), 2021-01-01
Supplement: d0tc05285j1.pdf [file d0tc05285j1.pdf]

## Supporting information

# Photoluminescence Emission Induced by Localized States in Halide-Passivated Colloidal Two-Dimensional WS<sub>2</sub> Nanoflakes

*Rosanna Mastria,<sup>1\*</sup> Anna Loiudice,<sup>2</sup> Jan Vávra,<sup>2</sup> Concetta Nobile,<sup>1</sup> Riccardo Scarfiello,<sup>1</sup> P. Davide Cozzoli,<sup>3,4</sup> Alessandro Kovtun,<sup>5</sup> Andrea Liscio,<sup>6</sup> Nicola Sestu,<sup>7</sup> Daniela Marongiu,<sup>7</sup> Francesco Quochi,<sup>7</sup> Raffaella Buonsanti,<sup>2</sup> Michele Saba,<sup>7</sup> Arrigo Calzolari,<sup>8</sup> Aurora Rizzo<sup>1\*</sup>*

<sup>1</sup>CNR NANOTEC - Institute of Nanotechnology, Polo di Nanotecnologia, c/o Campus Ecotekne, Via Monteroni, 73100 Lecce, Italy;

<sup>2</sup>Laboratory of Nanochemistry for Energy (LNCE), Department of Chemical Sciences and Engineering, École Polytechnique Fédérale de Lausanne, Sion, CH-1950, Switzerland

<sup>3</sup>Dipartimento di Matematica e Fisica “E. De Giorgi”, Università del Salento, Via per Arnesano, 73100 Lecce, Italy.

<sup>4</sup>UdR INSTM di Lecce, c/o, Università del Salento, Campus Ecotekne, via Arnesano, 73100 Lecce, Italy.

<sup>5</sup>CNR ISOF – Institute for the Organic Synthesis and Photoreactivity, via Gobetti 101, 40129, Bologna, Italy.

<sup>6</sup>Institute of Microelectronics and Microsystems (IMM), National Research Council of Italy (CNR), via del Fosso del Cavaliere 100, 00133 Rome, Italy

<sup>7</sup>Dipartimento di Fisica, Università di Cagliari, I-09042 Monserrato, Italy

<sup>8</sup>Istituto Nanoscienze, CNR-NANO, S3 Center, Via Campi 213/a, 41125 Modena, Italy

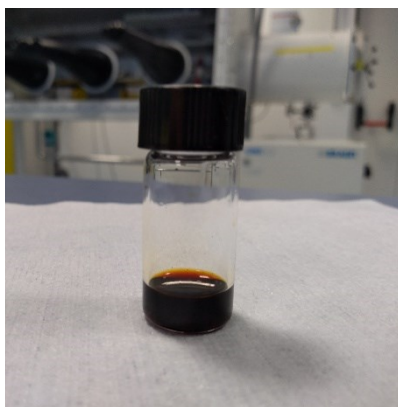

**Figure S1.** Picture of a concentrated (4 mg/mL) solution of Br<sup>-</sup> passivated WS<sub>2</sub> NFs in NMF

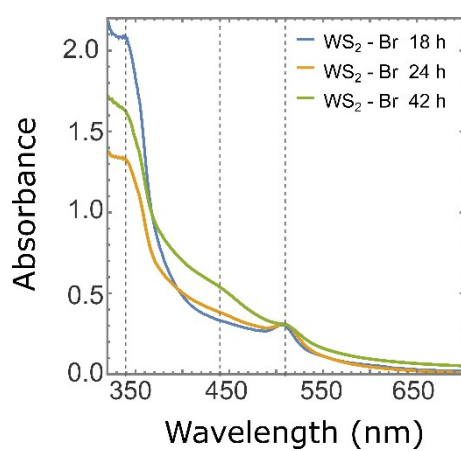

**Figure S2.** Evolution of UV-vis absorption spectra of Br<sup>-</sup> passivated WS<sub>2</sub> NFs as a function of the sonication time: 18h, 24 h, and 42 h. Each absorption spectrum is normalized to the A exciton peak.

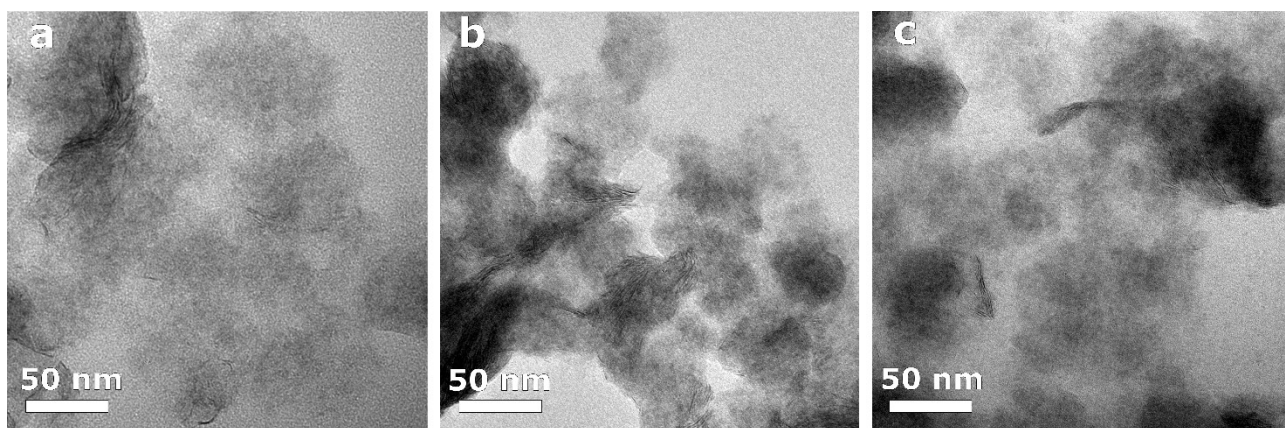

**Figure S3.** TEM images of Br-passivated WS<sub>2</sub> NFs after (a) 18h , (b) 24 h, and (c) 42 h of sonication.

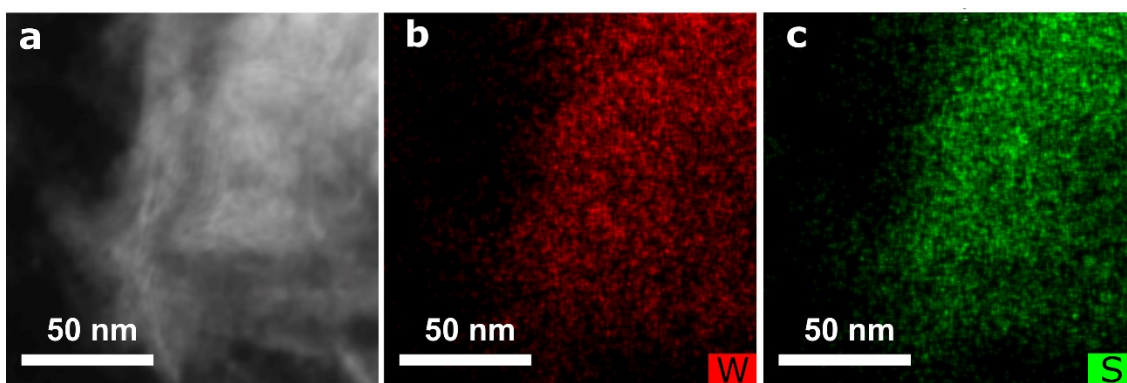

**Figure S4.** (a) HAADF-STEM image of Br-passivated  $\text{WS}_2$ - NFs with the corresponding elemental EDX maps for (b) W and (c) S.

|                            | W (at. %) | S (at. %) | Br (at. %) | S : W ratio |
|----------------------------|-----------|-----------|------------|-------------|
| Pristine $\text{WS}_2$ NFs | 42.5      | 57.5      | 0          | 1.4         |
| $\text{WS}_2$ - Br NFs     | 37.7      | 58.4      | 3.9        | 1.6         |

**Table S1.** Atomic concentration of the as-synthesized and Br<sup>-</sup> passivated  $\text{WS}_2$  NFs measured by the quantification of the EDX maps in Supplementary Figure 5. The selected energy transitions for atomic percentage quantification were L= 8.4 eV, K= 2.3 eV, K= 11.9 eV for W, S and Br respectively. The uncertainty on the EDX analysis was estimated to be 3-4%.

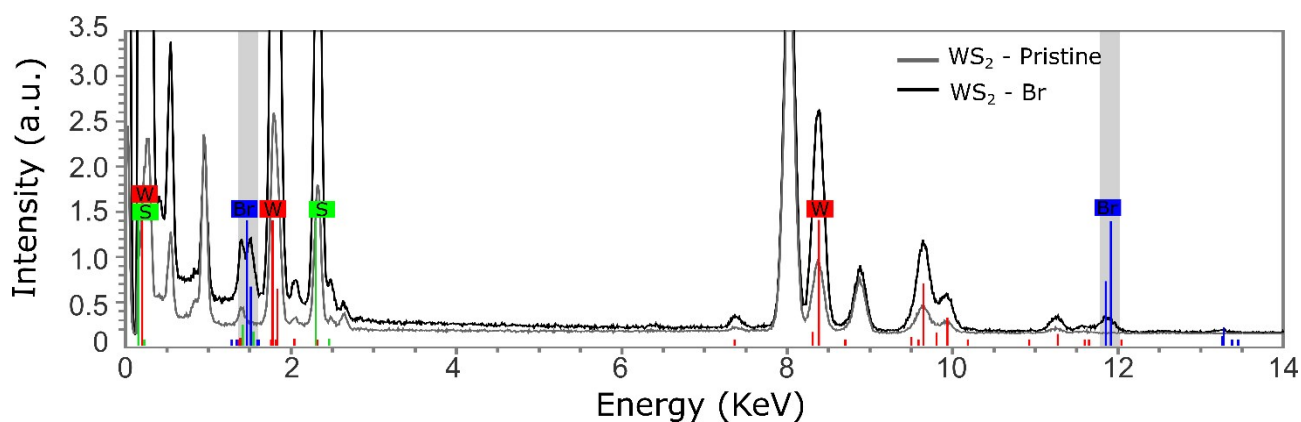

**Figure S5.** EDX spectra for the pristine and Br passivated  $\text{WS}_2$  NFs.

| XPS peak             | Chemical state         | Binding Energy (eV) | WS <sub>2</sub> Pristine | WS <sub>2</sub> Sonicated | WS <sub>2</sub> Br |
|----------------------|------------------------|---------------------|--------------------------|---------------------------|--------------------|
| W 4f <sub>7/2</sub>  | W-S                    | 32.4                | 3.3 ± 0.3                | 5.0 ± 0.3                 | 0.12 ± 0.03        |
|                      | W-O                    | 34.1 (+1.7)         | 0.76 ± 0.05              | 1.6 ± 0.1                 | 0.05 ± 0.01        |
|                      | WO <sub>3</sub>        | 36.2 (+3.8)         | 0.42 ± 0.05              | 0.90 ± 0.05               | -                  |
|                      | W-Br/W- O <sub>3</sub> | 35.7 (+3.3)         | -                        | -                         | 0.04 ± 0.01        |
| Br 3d <sub>5/2</sub> | Br 3d                  | 69.2                | -                        | -                         | 0.57 ± 0.07        |
| S 2p <sub>3/2</sub>  | S-O                    | 168                 | -                        | -                         | -                  |
|                      | S-W                    | 162.2               | 7.7 ± 0.5                | 13.6 ± 0.8                | 0.61 ± 0.08        |
| C 1s                 | C 1s                   | 284.8               | 78.4 ± 0.9               | 71.1 ± 0.9                | 86.3 ± 0.9         |
| O 1s                 | -                      | 532                 | 6.2 ± 0.5                | 3.4 ± 0.4                 | 4.9 ± 0.3          |
| In 3d <sub>5/2</sub> | In-O                   | 446.6               | 0.98 ± 0.08              | -                         | 1.2 ± 0.1          |
| N 1s                 | -                      | 401.1               | 2.2 ± 0.2                | 4.5 ± 0.2                 | 1.7 ± 0.2          |

**Table S2.** Chemical composition (at. %) and chemical states obtained by XPS analysis of pristine, sonicated and passivated WS<sub>2</sub> NFs samples.

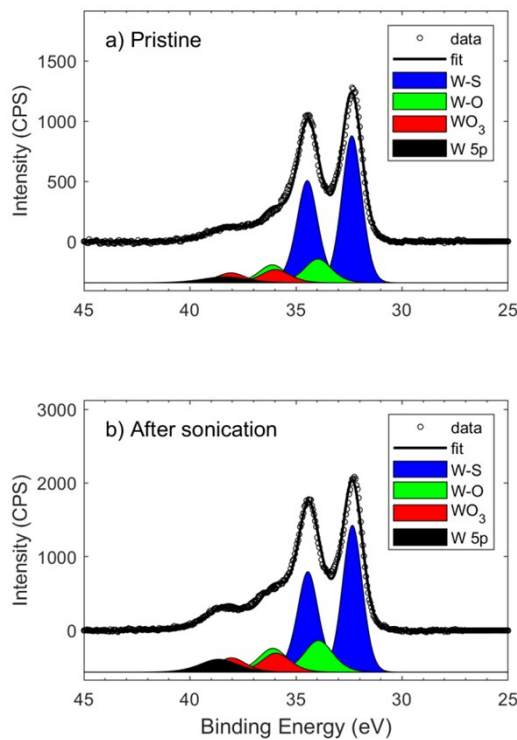

**Figure S6.** W 4f signal from (a) as synthesized WS<sub>2</sub> NFs and (b) WS<sub>2</sub> NFs after 24 h hour of sonication in NMF.

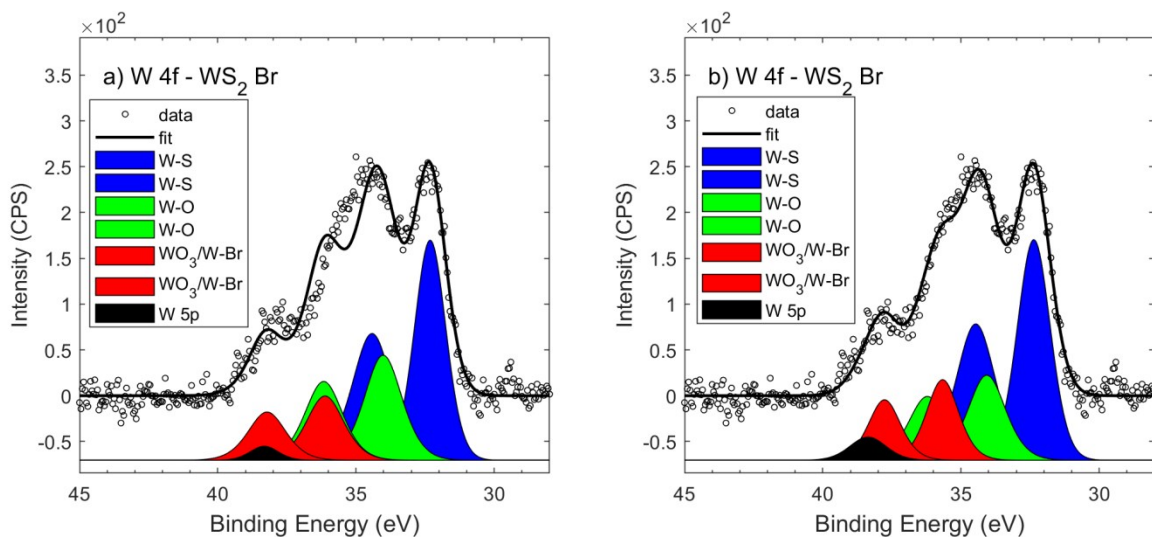

**Figure S7.** W 4f signal from Br-passivated WS<sub>2</sub> NFs (a) fitted with the same component in the same position of pristine WS<sub>2</sub> NFs, reduced chi square 0.396 and (b) by optimizing the position of WO<sub>3</sub>/W-Br group, reduced chi square 0.197.

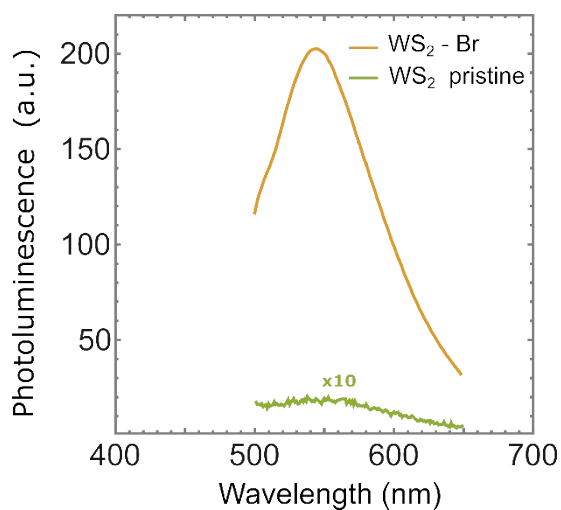

**Figure S8.** Photoluminescence spectra of pristine and Br-passivated WS<sub>2</sub> NFs.

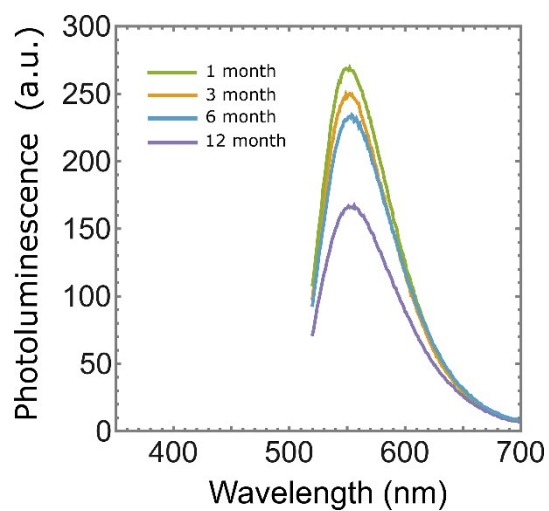

**Figure S9.** Photoluminescence spectra of Br<sup>-</sup> passivated WS<sub>2</sub> NFs after several months of storage in air. We record a significant photoluminescence reduction only after 12 months of air exposure.

### Passivation of WS<sub>2</sub> nanoflakes with I<sup>-</sup> ions

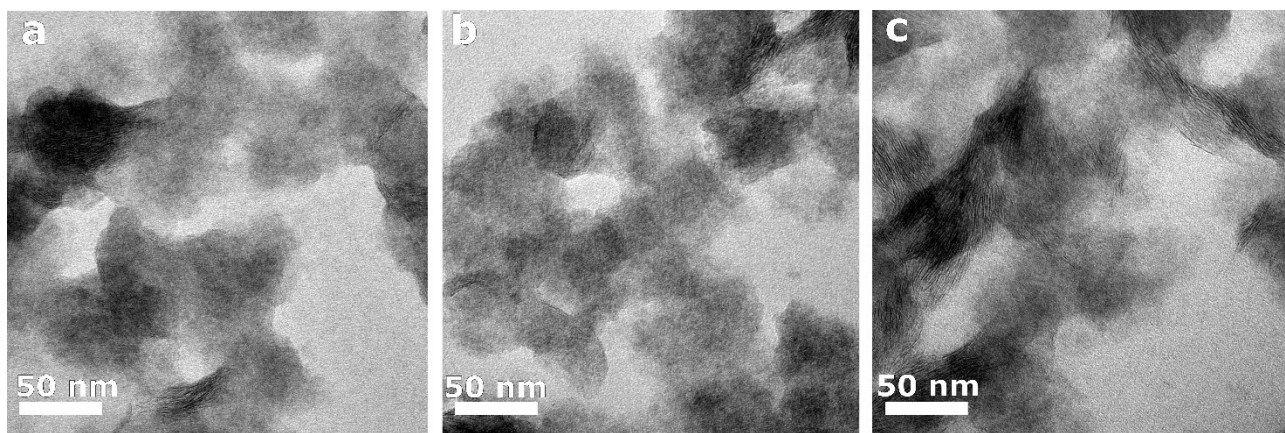

**Figure S10.** TEM images of I<sup>-</sup> passivated WS<sub>2</sub> NFs after (a) 18h, (b) 24 h, and (c) 42 h of sonication.

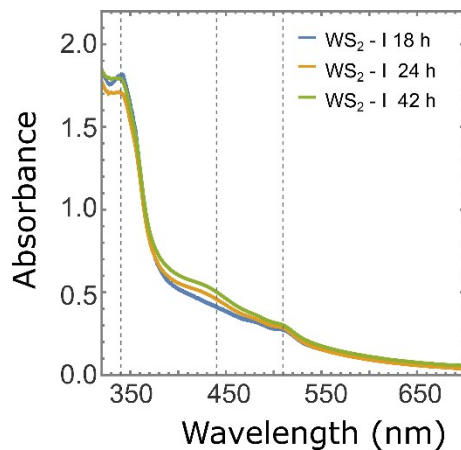

**Figure S11.** Evolution of UV-vis absorption spectra of I-passivated WS<sub>2</sub> NFs after 18h, 24 h, and 42 h of sonication

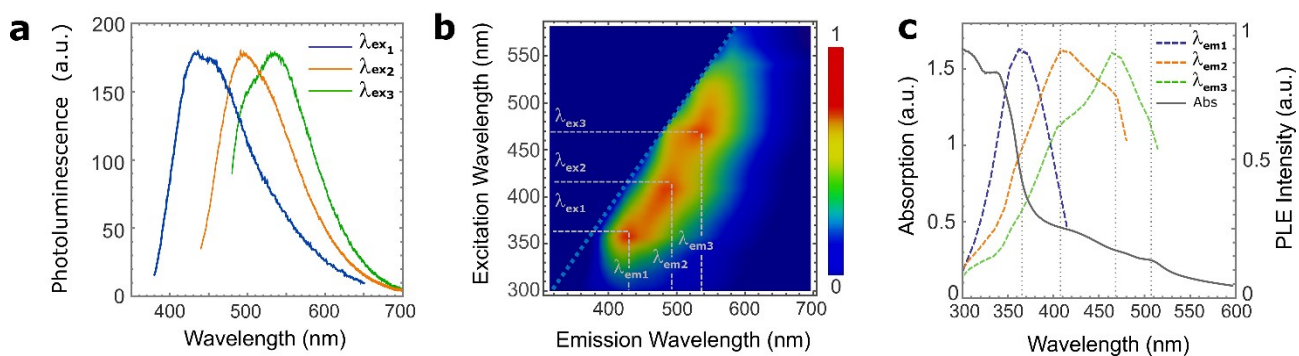

**Figure S12.** (a) PL spectra of I-passivated WS<sub>2</sub> NFs at excitation wavelengths of 380 nm ( $\lambda_{em1}$ ), 430 nm ( $\lambda_{em2}$ ), and 470 nm ( $\lambda_{em3}$ ). (b) PLE intensity map. (c) PLE spectra extracted from PLE map at detection wavelength corresponding to stronger PL emission signals (430 nm, 490 nm and 530 nm). The absorption spectrum is also shown for comparison.

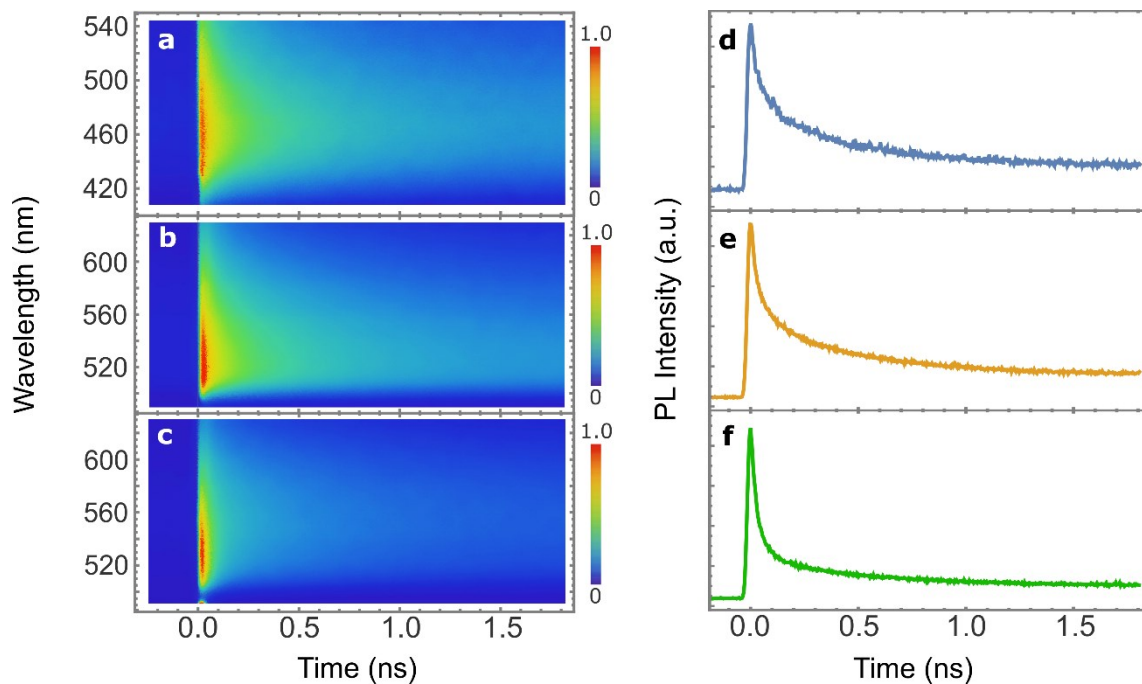

**Figure S13.** TRPL from I<sup>-</sup> passivated WS<sub>2</sub> NFs after 24 h of sonication. (a,b,c) TRPL emission maps of I<sup>-</sup> passivated WS<sub>2</sub> NFs for excitation wavelength of 380 nm, 430 nm, 470 nm, respectively; and (d,e,f) relative PL decay transients at detection wavelength at 530 nm.

### Passivation of WS<sub>2</sub> nanoflakes with Cl<sup>-</sup> ions

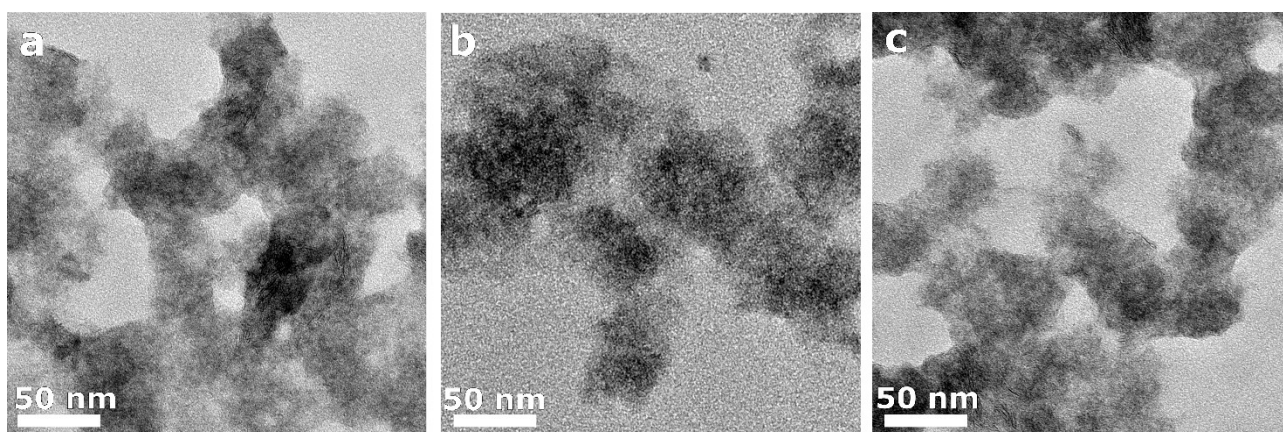

**Figure S14.** TEM images of Cl<sup>-</sup> passivated WS<sub>2</sub>-Cl NFs after (a) 18h, (b) 24 h, and (c) 42 h of sonication.



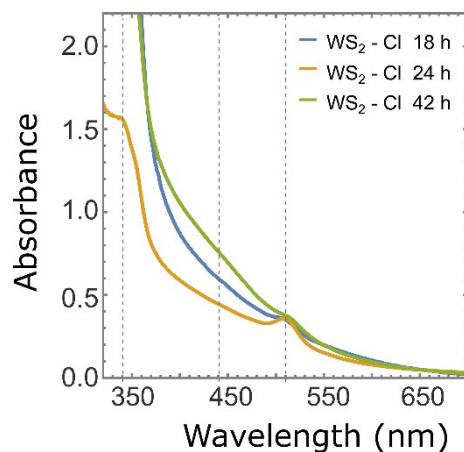

**Figure S15.** Evolution of UV-vis absorption spectra of Cl<sup>-</sup> passivated WS<sub>2</sub> NFs after 18h, 24 h, and 42 h of sonication

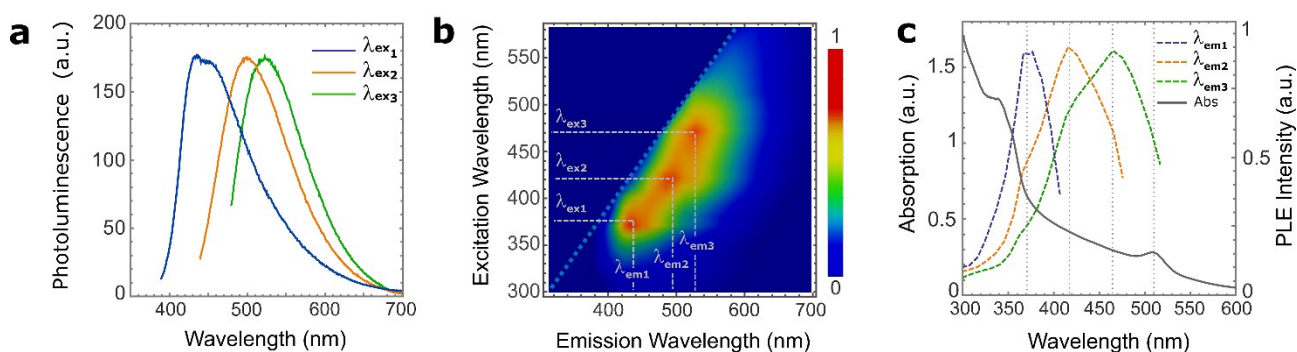

**Figure S16.** (a) PL spectra of Cl<sup>-</sup> passivated WS<sub>2</sub> NFs at excitation wavelengths of 380 nm ( $\lambda_{em1}$ ), 430 nm ( $\lambda_{em2}$ ), and 470 nm ( $\lambda_{em3}$ ). (b) PLE intensity map. (c) PLE spectra extracted from PLE map at detection wavelength corresponding to stronger PL emission signals (430 nm, 490 nm and 530 nm). The absorption spectrum is also shown for comparison.

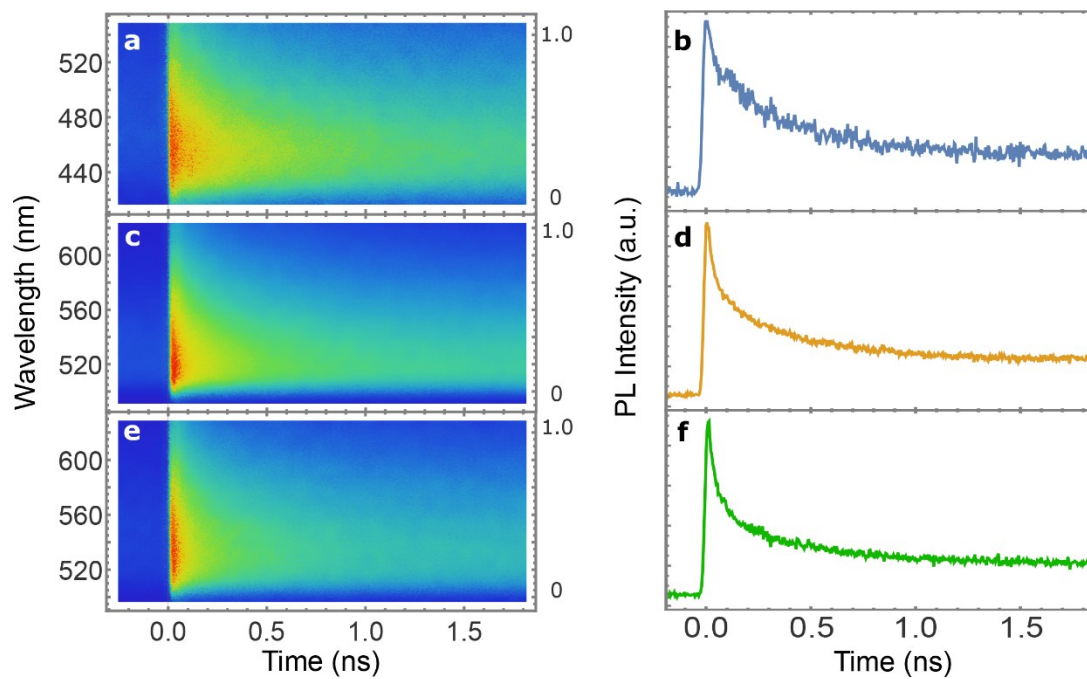

**Figure S17.** TRPL from Cl<sup>-</sup> passivated WS<sub>2</sub> NFs after 24 h of sonication. (a,c,e) TRPL emission maps of Cl<sup>-</sup> passivated WS<sub>2</sub> NFs for excitation wavelength of 380 nm, 430 nm, 470 nm, respectively; and (b,d,f) relative PL decay transients at a detection wavelength at 530 nm.

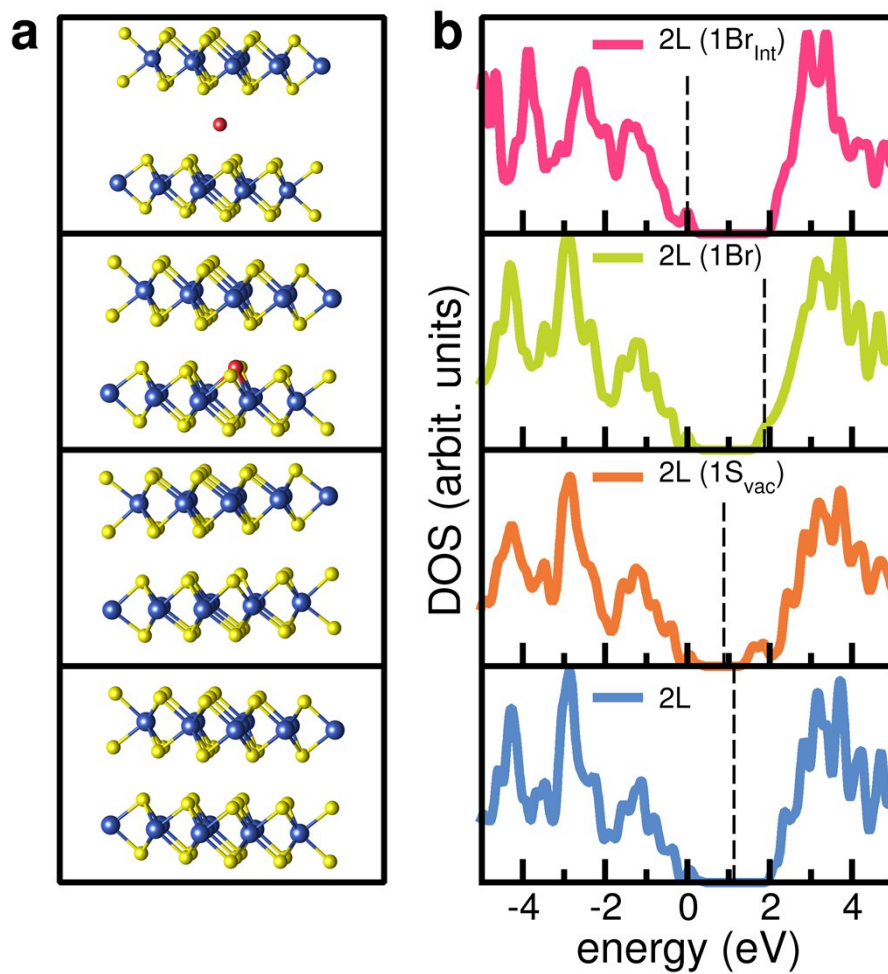

**Figure S18.** (a) Atomic structure and (b) density of states for WS<sub>2</sub> double layer (2L) with and without a single defect. From bottom to top: no defects; one S vacancy (1S<sub>vac</sub>), one substitutional Br atom (1Br); and one interstitial Br atom (1Br<sub>int</sub>).

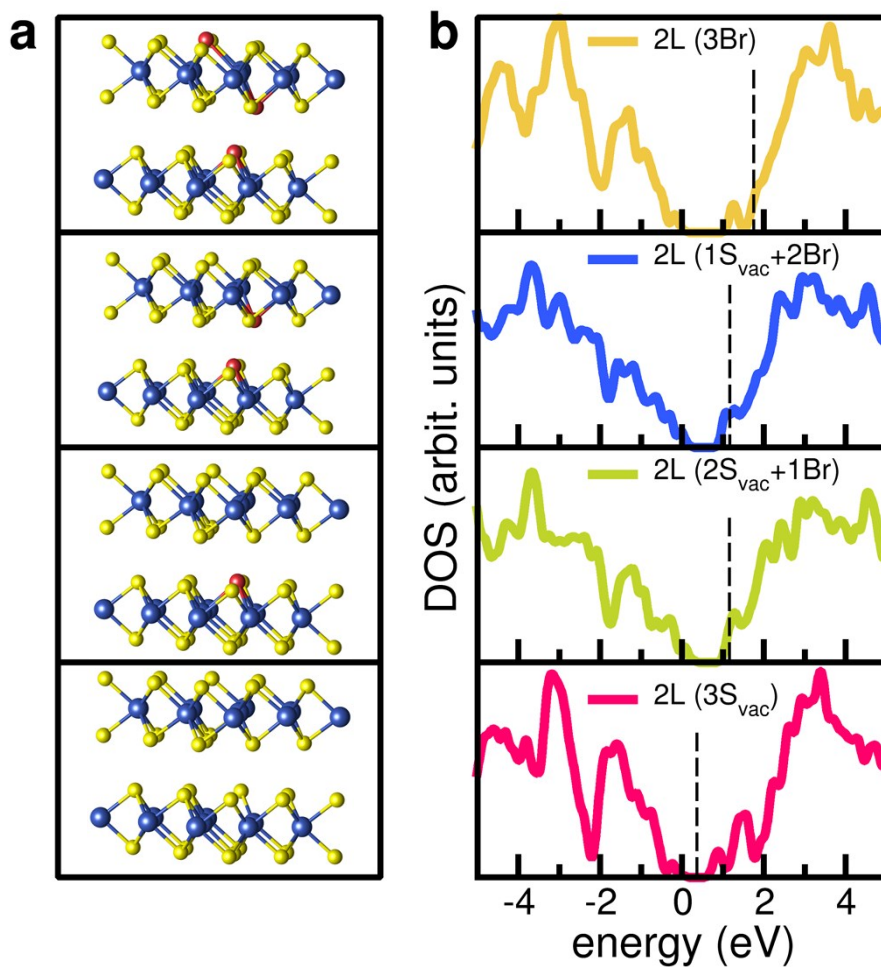

**Figure S19.** (a) Atomic structure, (b) density of states, and (c) absorption spectra for WS<sub>2</sub> double layer (2L) with three defects. From bottom to top: three S vacancy (3S<sub>vac</sub>), two S vacancy and one substitutional Br atom (2S<sub>vac</sub>+1Br), one S vacancy and two substitutional Br atoms (1S<sub>vac</sub>+2Br), three substitutional Br atoms (3Br).
